# Supplementary material for: Genome-wide sequence identification and expression analysis of N6-methyladenosine demethylase in sugar beet (Beta vulgaris L.) under salt stress
Source: PeerJ. 2022 Jan 5;10:e12719. doi: 10.7717/peerj.12719 (PMC8742538; doi:10.7717/peerj.12719)
Supplement: Supplemental Information 1 [file peerj-10-12719-s001.xlsx]

## Sheet: leaves
Template	gene	1	2	3	Template	gene	1	2	3
CK	PP2A	21.64	21.67	21.53	300	PP2A	20.64	20.8	21.03
	UBQ5	24.48	24.55	24.6		UBQ5	25.45	25.43	25.42
	huzh	23.04	22.91	22.95		huzh	23.54	23.34	23.36
	ryeg	25.54	25.98	25.67		ryeg	26.37	26.28	26.59
	pkhc	24.4	24.32	24.34		pkhc	23.9	23.72	24.06
	kacr	24.91	24.72	24.76		kacr	24.67	24.38	24.62
	pgse	25.02	25.13	25.19		pgse	25.91	26.02	26.05
	eskg	24.02	23.89	23.85		eskg	24.78	24.74	24.58
	sqec	23.46	23.47	23.46		sqec	25.02	24.49	24.87
	njrf	23.24	23.19	23.07		njrf	24.08	24.5	24.02
	swwm	21.78	21.7	21.45		swwm	27.07	26.92	26.73
	uxaj	22.87	22.82	22.9		uxaj	20.69	20.53	20.66

## Sheet: roots
Template	gene	1	2	3	Template	gene	1	2	3
CK	PP2A	22.01	22.01	22.04	300	PP2A	21.98	22.13	21.85
	25S RNA	22.8	23.14	22.96		25S RNA	23.5	23.42	23.44
	huzh	23.34	23.44	23.25		huzh	23.24	23.29	23.28
	ryeg	25.73	25.98	25.33		ryeg	25.31	25.59	25.55
	pkhc	24.09	24.19	23.98		pkhc	26.27	26.25	26.12
	kacr	24.13	24.28	24.3		kacr	26.36	26.25	26.34
	pgse	26.18	26.14	26.16		pgse	28.15	28.31	28.2
	eskg	23.71	23.42	23.56		eskg	23.54	23.34	23.61
	sqec	24.99	25.16	24.75		sqec	25.85	25.76	25.81
	njrf	23.5	23.23	23.31		njrf	23.48	23.33	23.41
	swwm	25.36	25.46	25.62		swwm	25.06	25.1	24.73
	uxaj	22.9	23.06	22.76		uxaj	23.42	23.53	23.71
